# Supplementary material for: High laboratory mouse pre-weaning mortality associated with litter overlap, advanced dam age, small and large litters
Source: PubMed Central journal article supplement (PMC7423063; doi:10.1371/journal.pone.0236290), 2020-08-12

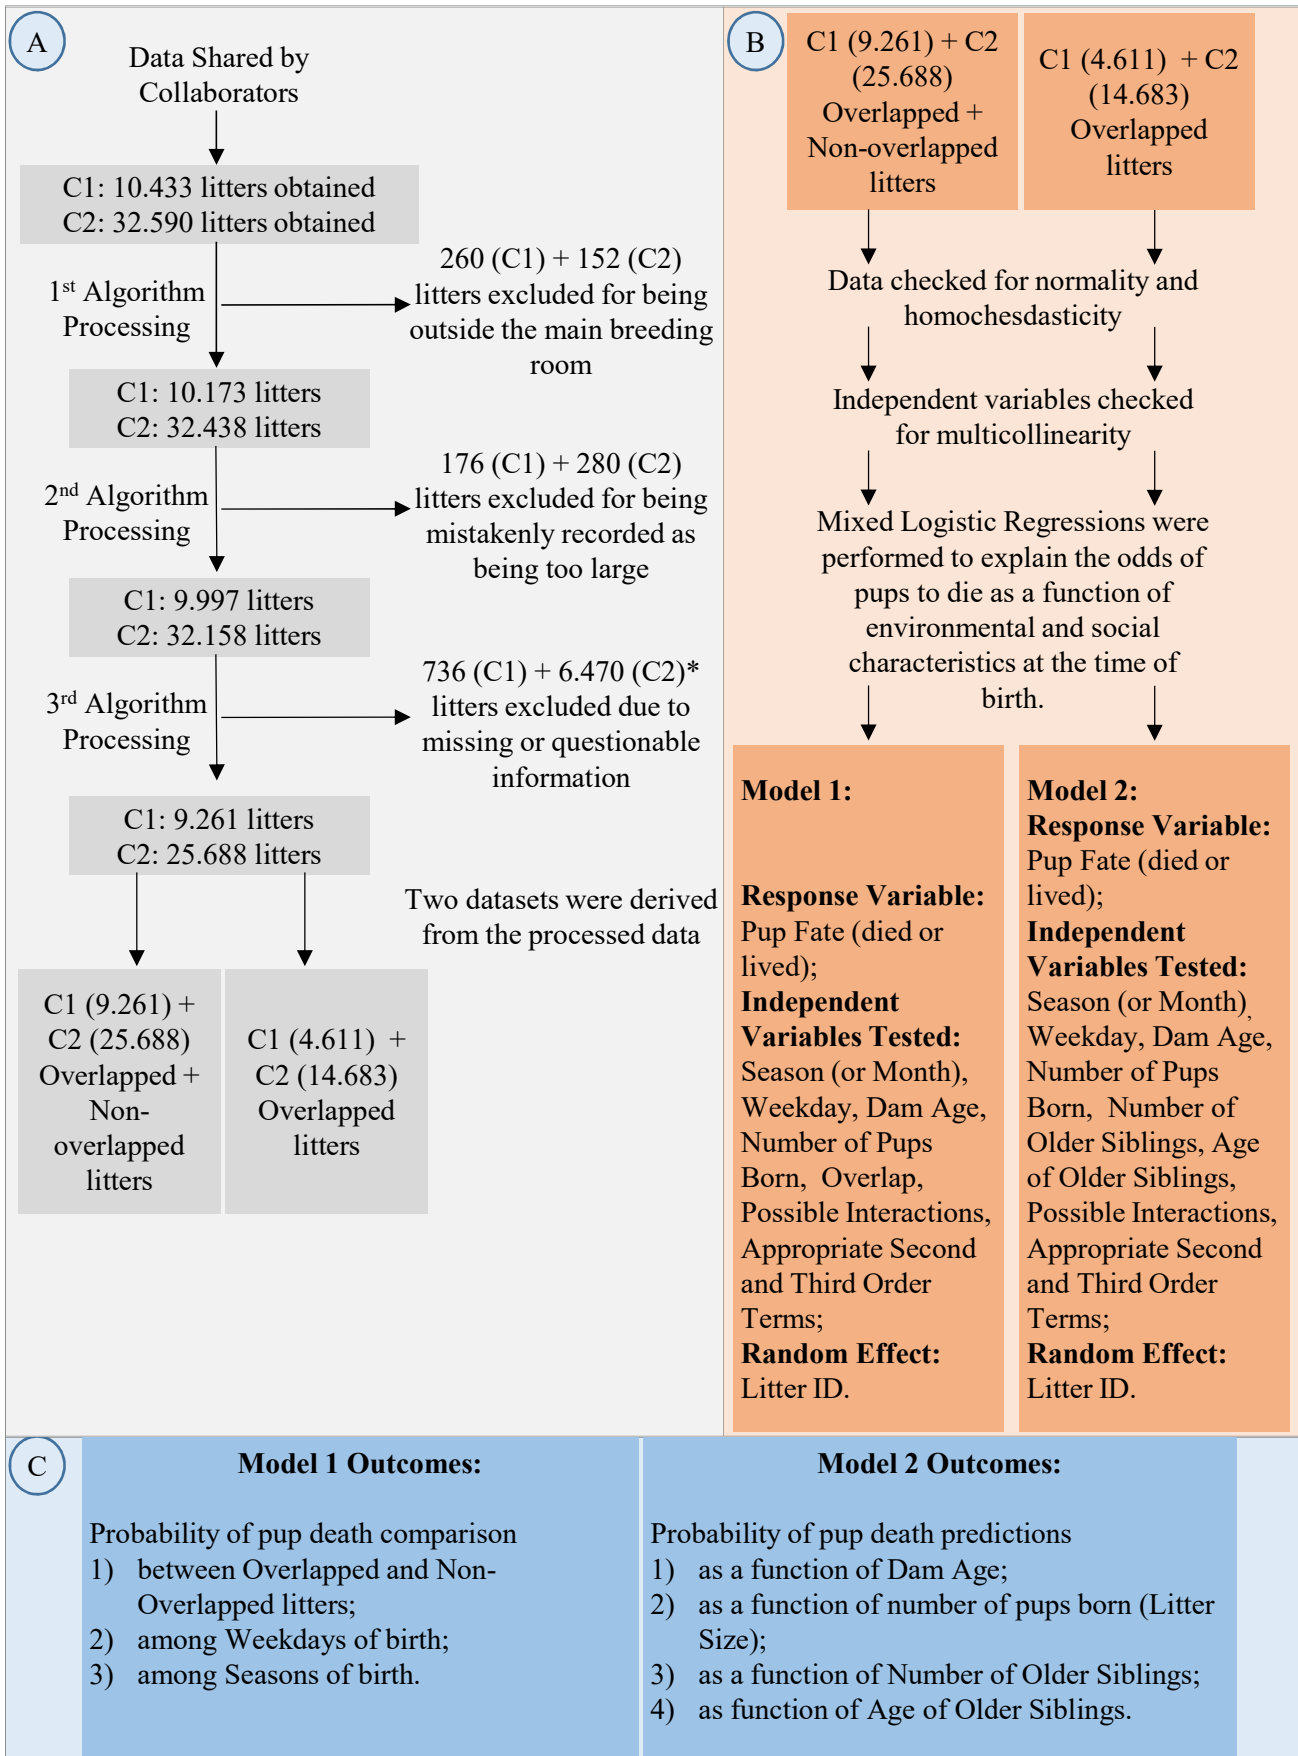

Supplement: pone.0236290.s001.pdf [file pone.0236290.s001.pdf]
