# Supplementary material for: High laboratory mouse pre-weaning mortality associated with litter overlap, advanced dam age, small and large litters
Source: PubMed Central journal article supplement (PMC7423063; doi:10.1371/journal.pone.0236290), 2020-08-12
Supplement: pone.0236290.s004.pdf [file pone.0236290.s004.pdf]

| Effect                                         | Estimate | Standard Error | t Value | Pr >  t |
|------------------------------------------------|----------|----------------|---------|---------|
| <b>Intercept</b>                               | -1.0546  | 0.0751         | -14.04  | <0.0001 |
| <b>Collaborator C1</b>                         | 2.3067   | 0.1011         | 22.81   | <0.0001 |
| <b>Collaborator C2</b>                         | 0.0000   | n.a.           | n.a.    | n.a.    |
| <b>Season Fall</b>                             | -0.1468  | 0.0354         | -4.14   | <0.0001 |
| <b>Season Spring</b>                           | -0.1082  | 0.0360         | -3.00   | 0.0027  |
| <b>Season Summer</b>                           | -0.1234  | 0.0400         | -3.09   | 0.0020  |
| <b>Season Winter</b>                           | 0.0000   | n.a.           | n.a.    | n.a.    |
| <b>Weekday 1</b>                               | -0.0054  | 0.0517         | -0.11   | 0.9162  |
| <b>Weekday 2</b>                               | 0.7230   | 0.0472         | 15.33   | <0.0001 |
| <b>Weekday 3</b>                               | 1.2433   | 0.0463         | 26.86   | <0.0001 |
| <b>Weekday 4</b>                               | 1.4133   | 0.0453         | 31.18   | <0.0001 |
| <b>Weekday 5</b>                               | 0.8705   | 0.0461         | 16.88   | <0.0001 |
| <b>Weekday 6</b>                               | 0.3000   | 0.0482         | 6.22    | <0.0001 |
| <b>Weekday 7</b>                               | 0.0000   | n.a.           | n.a.    | n.a.    |
| <b>Dam Age</b>                                 | 0.0046   | 0.0003         | 15.89   | <0.0001 |
| <b>Litter Size<sup>a</sup></b>                 | -0.7104  | 0.0134         | -53.20  | <0.0001 |
| <b>Litter Size<sup>a</sup>^2<sup>a</sup></b>   | 0.0345   | 0.0009         | 36.73   | <0.0001 |
| <b>Overlap No</b>                              | -0.4969  | 0.0240         | -20.67  | <0.0001 |
| <b>Overlap Yes</b>                             | 0.0000   | n.a.           | n.a.    | n.a.    |
| <b>Collaborator C1* Season Fall</b>            | 0.2607   | 0.0488         | 5.35    | <0.0001 |
| <b>Collaborator C1* Season Spring</b>          | 0.1647   | 0.0495         | 3.33    | 0.0009  |
| <b>Collaborator C1* Season Summer</b>          | 0.0435   | 0.0541         | 0.80    | 0.4210  |
| <b>Collaborator C1* Season Winter</b>          | 0.0000   | n.a.           | n.a.    | n.a.    |
| <b>Collaborator C2* Season Fall</b>            | 0.0000   | n.a.           | n.a.    | n.a.    |
| <b>Collaborator C2* Season Spring</b>          | 0.0000   | n.a.           | n.a.    | n.a.    |
| <b>Collaborator C2* Season Summer</b>          | 0.0000   | n.a.           | n.a.    | n.a.    |
| <b>Collaborator C2* Season Winter</b>          | 0.0000   | n.a.           | n.a.    | n.a.    |
| <b>Collaborator C1* Weekday Sunday</b>         | 0.04295  | 0.0683         | 0.63    | 0.5292  |
| <b>Collaborator C1* Weekday Monday</b>         | -0.4495  | 0.0639         | -7.04   | <0.0001 |
| <b>Collaborator C1* Weekday Tuesday</b>        | -0.8161  | 0.0637         | -12.81  | <0.0001 |
| <b>Collaborator C1* Weekday Wednesday</b>      | -1.1965  | 0.0626         | -19.11  | <0.0001 |
| <b>Collaborator C1* Weekday Thursday</b>       | -0.6996  | 0.0632         | -11.06  | <0.0001 |
| <b>Collaborator C1* Weekday Friday</b>         | -0.3375  | 0.0648         | -5.21   | <0.0001 |
| <b>Collaborator C1* Weekday Saturday</b>       | 0.0000   | n.a.           | n.a.    | n.a.    |
| <b>Collaborator C2* Weekday Sunday</b>         | 0.0000   | n.a.           | n.a.    | n.a.    |
| <b>Collaborator C2* Weekday Monday</b>         | 0.0000   | n.a.           | n.a.    | n.a.    |
| <b>Collaborator C2* Weekday Tuesday</b>        | 0.0000   | n.a.           | n.a.    | n.a.    |
| <b>Collaborator C2* Weekday Wednesday</b>      | 0.0000   | n.a.           | n.a.    | n.a.    |
| <b>Collaborator C2* Weekday Thursday</b>       | 0.0000   | n.a.           | n.a.    | n.a.    |
| <b>Collaborator C2* Weekday Friday</b>         | 0.0000   | n.a.           | n.a.    | n.a.    |
| <b>Collaborator C2* Weekday Saturday</b>       | 0.0000   | n.a.           | n.a.    | n.a.    |
| <b>Collaborator C1*Dam Age</b>                 | -0.0013  | 0.0003         | -3.81   | 0.0001  |
| <b>Collaborator C2*Dam Age</b>                 | 0.0000   | n.a.           | n.a.    | n.a.    |
| <b>Collaborator C1*Litter Size<sup>a</sup></b> | 0.0484   | 0.0066         | 7.37    | <0.0001 |
| <b>Collaborator C2*Litter Size<sup>a</sup></b> | 0.0000   | n.a.           | n.a.    | n.a.    |
| <b>Collaborator C1*Overlap No</b>              | 0.1426   | 0.0332         | 4.30    | <0.0001 |
| <b>Collaborator C1*Overlap Yes</b>             | 0.0000   | n.a.           | n.a.    | n.a.    |
| <b>Collaborator C2*Overlap No</b>              | 0.0000   | n.a.           | n.a.    | n.a.    |
| <b>Collaborator C2*Overlap Yes</b>             | 0.0000   | n.a.           | n.a.    | n.a.    |

| <b>Type III (Partial) Tests of Fixed Effects</b> |               |                |                  |
|--------------------------------------------------|---------------|----------------|------------------|
| <b>Effect</b>                                    | <b>Num DF</b> | <b>F Value</b> | <b>Pr &gt; F</b> |
| <b>Collaborator</b>                              | 1             | 579.79         | <0.0001          |
| <b>Season</b>                                    | 3             | 5.84           | 0.0006           |
| <b>Weekday</b>                                   | 6             | 256.88         | <0.0001          |
| <b>Dam Age</b>                                   | 1             | 511.62         | <0.0001          |
| <b>Litter Size<sup>a</sup></b>                   | 1             | 2563.59        | <0.0001          |
| <b>Litter Size<sup>a</sup>^2<sup>a</sup></b>     | 1             | 1349.04        | <0.0001          |
| <b>Overlap</b>                                   | 1             | 658.04         | <0.0001          |
| <b>Collaborator*Season</b>                       | 3             | 13.55          | <0.0001          |
| <b>Collaborator*Weekday</b>                      | 6             | 102.88         | <0.0001          |
| <b>Collaborator*Dam Age</b>                      | 1             | 14.48          | 0.0001           |
| <b>Collaborator*Litter Size<sup>a</sup></b>      | 1             | 54.30          | <0.0001          |
| <b>Collaborator*Overlap</b>                      | 1             | 18.46          | <0.0001          |

n.a.=not applicable.

<sup>a</sup>Variable Litter Size was centered by its mean.
