# Supplementary material for: High laboratory mouse pre-weaning mortality associated with litter overlap, advanced dam age, small and large litters
Source: PubMed Central journal article supplement (PMC7423063; doi:10.1371/journal.pone.0236290), 2020-08-12
Supplement: pone.0236290.s005.pdf [file pone.0236290.s005.pdf]

| Effect                                   | Estimate | Standard Error | t Value | Pr >  t |
|------------------------------------------|----------|----------------|---------|---------|
| Intercept                                | -11.5390 | 0.3921         | -29.43  | <0.0001 |
| Collaborator C1                          | -2.2587  | 0.5681         | -3.98   | <0.0001 |
| Collaborator C2                          | 0.0000   | n.a.           | n.a.    | n.a.    |
| Weekday 1                                | -0.0671  | 0.2256         | -0.30   | 0.7663  |
| Weekday 2                                | 0.5713   | 0.2105         | 2.71    | 0.0066  |
| Weekday 3                                | 1.1023   | 0.2139         | 5.15    | <0.0001 |
| Weekday 4                                | 1.5854   | 0.2116         | 7.49    | <0.0001 |
| Weekday 5                                | 0.3004   | 0.2109         | 1.42    | 0.1544  |
| Weekday 6                                | 0.0120   | 0.2184         | 0.05    | 0.9563  |
| Weekday 7                                | 0.0000   | n.a.           | n.a.    | n.a.    |
| Season Fall                              | 0.0219   | 0.1584         | 0.14    | 0.8902  |
| Season Spring                            | 0.4246   | 0.1562         | 2.72    | 0.0066  |
| Season Summer                            | 0.4826   | 0.1564         | 3.09    | 0.0020  |
| Season Winter                            | 0.0000   | n.a.           | n.a.    | n.a.    |
| Dam Age                                  | 0.0083   | 0.0012         | 7.25    | <0.0001 |
| Litter Size <sup>a</sup>                 | -0.2233  | 0.0228         | -9.78   | <0.0001 |
| Litter Size <sup>a</sup> 2 <sup>a</sup>  | 0.0814   | 0.0055         | 14.80   | <0.0001 |
| Sibling Number                           | 0.02873  | 0.0396         | 0.73    | 0.4676  |
| Sibling Age                              | -0.0143  | 0.0194         | -0.74   | 0.4618  |
| Sibling Number*Sibling Age               | 0.0181   | 0.0029         | 6.29    | <0.0001 |
| Collaborator C1*Sibling Age              | 0.5338   | 0.0217         | 24.61   | <0.0001 |
| Collaborator C2*Sibling Age              | 0.0000   | n.a.           | n.a.    | n.a.    |
| Collaborator C1*Sibling Number           | 0.4587   | 0.0464         | 9.88    | <0.0001 |
| Collaborator C2*Sibling Number           | 0.0000   | n.a.           | n.a.    | n.a.    |
| Collaborator C1*Litter Size <sup>a</sup> | 0.2170   | 0.0502         | 4.33    | <0.0001 |
| Collaborator C2*Litter Size <sup>a</sup> | 0.0000   | n.a.           | n.a.    | n.a.    |
| Collaborator C1* Season Fall             | 0.5386   | 0.3721         | 1.45    | 0.1478  |
| Collaborator C1* Season Spring           | -0.420   | 0.3566         | -0.12   | 0.9063  |
| Collaborator C1* Season Summer           | -0.7081  | 0.3697         | -1.92   | 0.0554  |
| Collaborator C1* Season Winter           | 0.0000   | n.a.           | n.a.    | n.a.    |
| Collaborator C2* Season Fall             | 0.0000   | n.a.           | n.a.    | n.a.    |
| Collaborator C2* Season Spring           | 0.0000   | n.a.           | n.a.    | n.a.    |
| Collaborator C2* Season Summer           | 0.0000   | n.a.           | n.a.    | n.a.    |
| Collaborator C2* Season Winter           | 0.0000   | n.a.           | n.a.    | n.a.    |
| Collaborator C1* Weekday Sunday          | 0.9696   | 0.5306         | 1.83    | 0.0676  |
| Collaborator C1* Weekday Monday          | -0.7351  | 0.4891         | -1.50   | 0.1328  |
| Collaborator C1* Weekday Tuesday         | -0.4743  | 0.5124         | -0.93   | 0.3546  |
| Collaborator C1* Weekday Wednesday       | -2.0820  | 0.4996         | -4.17   | <0.0001 |
| Collaborator C1* Weekday Thursday        | -0.6480  | 0.5063         | -1.28   | 0.2006  |
| Collaborator C1* Weekday Friday          | -0.0665  | 0.5011         | -0.13   | 0.8944  |
| Collaborator C1* Weekday Saturday        | 0.0000   | n.a.           | n.a.    | n.a.    |
| Collaborator C2* Weekday Sunday          | 0.0000   | n.a.           | n.a.    | n.a.    |
| Collaborator C2* Weekday Monday          | 0.0000   | n.a.           | n.a.    | n.a.    |
| Collaborator C2* Weekday Tuesday         | 0.0000   | n.a.           | n.a.    | n.a.    |
| Collaborator C2* Weekday Wednesday       | 0.0000   | n.a.           | n.a.    | n.a.    |
| Collaborator C2* Weekday Thursday        | 0.0000   | n.a.           | n.a.    | n.a.    |
| Collaborator C2* Weekday Friday          | 0.0000   | n.a.           | n.a.    | n.a.    |
| Collaborator C2* Weekday Saturday        | 0.0000   | n.a.           | n.a.    | n.a.    |

| <b>Type III (Partial) Tests of Fixed Effects</b> |               |                |                  |
|--------------------------------------------------|---------------|----------------|------------------|
| <b>Effect</b>                                    | <b>Num DF</b> | <b>F Value</b> | <b>Pr &gt; F</b> |
| <b>Collaborator</b>                              | 1             | 47.32          | <0.0001          |
| <b>Weekday</b>                                   | 6             | 3.96           | 0.0006           |
| <b>Season</b>                                    | 3             | 1.96           | 0.1183           |
| <b>Dam Age</b>                                   | 1             | 52.54          | <0.0001          |
| <b>Litter Size<sup>a</sup></b>                   | 1             | 17.40          | <0.0001          |
| <b>Litter Size<sup>a</sup>^2<sup>a</sup></b>     | 1             | 219.15         | <0.0001          |
| <b>Sibling Number</b>                            | 1             | 40.91          | <0.0001          |
| <b>Sibling Age</b>                               | 1             | 135.48         | <0.0001          |
| <b>Sibling Number*Sibling Age</b>                | 1             | 39.61          | <0.0001          |
| <b>Collaborator*Sibling Age</b>                  | 1             | 605.64         | <0.0001          |
| <b>Collaborator*Sibling Number</b>               | 1             | 97.59          | <0.0001          |
| <b>Collaborator*Litter Size</b>                  | 1             | 18.72          | <0.0001          |
| <b>Collaborator*Season</b>                       | 3             | 3.80           | 0.0098           |
| <b>Collaborator*Weekday</b>                      | 6             | 7.22           | <0.0001          |

n.a.=not applicable.

<sup>a</sup>Variable Litter Size was centered by its mean.
